# Supplementary material for: Protective Effects of ζ-Carotene-like Compounds against Acute UVB-Induced Skin Damage
Source: MDPI journal article supplement (doi:10.3390/ijms241813970), 2023-09-12
Supplement: s1 [file s1]

Supplementary Figure S1. ROS accumulation in HaCAT cells. (A, B and C are NC, UVB and UVB+ CLC groups, respectively).

Supplementary Figure S2. The suppressive effect of CLC on apoptotic factors (A-C) and CPD content (D). (A, B and C are NC, UVB and UVB+ CLC groups, respectively n=3, \*  $p < 0.05$ , \*\*  $p < 0.01$  vs the UVB group.).

Supplementary Figure S3. The body weight (A) and food intake (B) in mice during UVB irradiation. (n=10, 3.2, 3.6, 3.10, 3.15 and 3.20 are March 2, March 6, March 10, March 15 and March 20, respectively).

Supplementary Figure S4. The skin status and clinical score (n=10). (A is NCS group, B is MCS group, C is H- $\zeta$ S, D is L- $\zeta$ S, E is VES, F is the clinical evaluation score. ##  $p < 0.01$  vs the NCS group and \*\*  $p < 0.01$  vs the MCS group.).

Supplementary Figure S5. A-H are the relative mRNA expression of Keap1/Nrf2/ARE signaling pathway. (n=3, # $p < 0.05$ , ## $p < 0.01$  vs the NCS group and \* $p < 0.05$ , \*\* $p < 0.001$  vs the MCS group, ns is no significance).

Supplementary Figure S6. A-G are the relative mRNA expression of MAPK signaling pathway. (n=3, # $p < 0.05$ , ## $p < 0.01$  vs the NCS group and \* $p < 0.05$ , \*\* $p < 0.001$  vs the MCS group, ns is no significance).

Supplementary Figure S7. The levels of procollagen I (A), HYP (B), HA (C), skin water content (D) and ROS (E) in skin tissue. (n=3, # $p < 0.05$ , ## $p < 0.01$  vs the NCS group and \* $p < 0.05$ , \*\* $p < 0.001$  vs the MCS group, ns is no significance).

Supplementary Figure S8. A-G are the relative mRNA expression of PKA/CREB signaling pathway, H is the tyrosinase activity. (n=3, # $p < 0.05$ , ## $p < 0.01$  vs the NCS group and \* $p < 0.05$ , \*\* $p < 0.001$  vs the MCS group, ns is no significance).
