# Supplementary material for: Protective Effects of ζ-Carotene-like Compounds against Acute UVB-Induced Skin Damage
Source: MDPI journal article supplement (doi:10.3390/ijms241813970), 2023-09-12
Supplement: s1 [file s1]

Supplementary Table S1. Primers gene sequence in animal experiments.

| Gene name       | Primer forward 5'-3'      | Primer reversed 5'-3'     |
|-----------------|---------------------------|---------------------------|
| Nrf2            | TTCCTTCAGCAGCATCCTCTCC    | AATCTGTGTTGACTGTGGCATCTG  |
| HO-1            | CTGCGTTCCTGCTCAACATCC     | GGGCTCTGGTCCTTGGTGTC      |
| NQO1            | CTGCGTTCCTGCTCAACATCC     | GGGCTCTGGTCCTTGGTGTC      |
| COX-2           | GGTTGCTGGTGGTAGGAATGTTC   | TCTGCCTGCTCTGGTCAATGG     |
| P-38            | GATACAAAGACGGGGCATCG      | CACGATGTTGTTCAAGTCCG      |
| ERK             | GCCTTCCAACCTCCTGCTGAAC    | CGTACTCTGTCAAGAACCCTGTGTG |
| JNK             | CGCCTTATGTGGTGACTCGCTAC   | CTCCCATGATGCACCCAACCTGAC  |
| MMP-1           | ATTCTACTGATATCGGGGCTTTGA  | ATGTCCTTGGGGTATCCGTGTAG   |
| MMP-2           | ACCATGCGGAAGCCAAGATGTG    | AGGGTCCAGGTCAGGTGTGTAAC   |
| collagen type I | AGGGCAAAGATCCCTGAAGT      | GGCAGAAAGCACAGCACTC       |
| AP-1            | CTTCTACGACGATGCCCTCAACG   | GCCAGGTTCAAGGTCATGCTCTG   |
| PKA             | GAGCAGGAGAGCGTGAAAGAG     | GGGCTGTATTCTGAGAAGGGG     |
| CREB            | CCAGTCTCCACAAGTCCAAACA    | GGCACTGTTAGAGTGGTGGTATG   |
| MITF            | AGAAGCTGGAGCATGCGAACC     | GTTCTGGCTGCAGTTCTCAAG     |
| TYR             | AGTCGTATCTGGCCATGGCTTCTTG | GCAAGCTGTGGTAGTCGTCTTTGTC |
| TYRP1           | CTGCGATGTCTGCACTGATGACCTG | TTTCTCCTGATTGGTCCACCCTCAG |
| TYRP2           | GGGCAGCGAGACCAGACGAT      | TTGGCAATTCATGCTGTTTCTTC   |
| Rab27A          | GTAGTGAAAGAGGAGGAAGC      | TCATTATCAGGTCCAGAAGC      |
| IL-6            | TTCGGTCCAGTTGCCTTCTCC     | TTCTGAAGAGGTGAGTGGCTGTC   |
| IL-β            | TGGCTTATTACAGTGGCAATGAGG  | AGTGGTGGTCGGAGATTCGTAG    |

|               |                          |                     |
|---------------|--------------------------|---------------------|
| NF-KB         | CTCTCGCCTGCCTCCACAAG     | ATGTCTCCACGCCGCTGTC |
| TNF- $\alpha$ | CTCATCTACTCCCAGGTCCTCTTC | CGATGCGGCTGATGGTGTG |
| GAPDH         | AGGTCGGTGTGAACGGATTTG    | GGGGTCGTTGATGGCAACA |

Supplementary Table S2. Primers gene sequence in cell experiments.

| Gene name | Primer fowerd 5'-3'       | Primer reversed 5'-3'     |
|-----------|---------------------------|---------------------------|
| Nrf2      | CAGTGCTCCTATGCGTGAA       | GCGGCTTGAATGTTTGTC        |
| Keap1     | TGCTCAACCGCTTGCTGTATGC    | GCGAGAAGAGCCCTGATTGTACTG  |
| HO-1      | ACAGATGGCGTCACTTCG        | TGAGGACCCACTGGAGGA        |
| NQO1      | AGGATGGGAGGTACTCGAATC     | TGCTAGAGATGACTCGGAAGG     |
| PKA       | GAGCAGGAGAGCGTGAAAGAG     | GGGCTGTATTCTGAGAAGGGG     |
| CREB      | CCAGTCTCCACAAGTCCAAACA    | GGCACTGTTAGAGTGGTGGTATG   |
| MITF      | AGAAGCTGGAGCATGCGAACC     | GTTCTGGCTGCAGTTCTCAAG     |
| TYR       | AGTCGTATCTGGCCATGGCTTCTTG | GCAAGCTGTGGTAGTCGTCTTTGTC |
| TYRP1     | CTGCGATGTCTGCACTGATGACCTG | TTTCTCCTGATTGGTCCACCCTCAG |
| TYRP2     | GGGCAGCGAGACCAGACGAT      | TTGGCAATTTTCATGCTGTTTCTTC |
| Rab27A    | GTAGTGAAAGAGGAGGAAGC      | TCATTATCAGGTCCAGAAGC      |
| GAPDH     | AGGTCGGTGTGAACGGATTTG     | GGGGTCGTTGATGGCAACA       |
