# Supplementary material for: Protective Effects of ζ-Carotene-like Compounds against Acute UVB-Induced Skin Damage
Source: Int J Mol Sci. 2023 Sep 12;24(18):13970. doi: 10.3390/ijms241813970 (PMC10530282; doi:10.3390/ijms241813970)
Supplement: Supplementary file 1 [file ijms-24-13970-s001.zip]

Archive with 16 entries (16 files):
- Figure S1A.tif
- Figure S1B.tif
- Figure S1C.tif
- Figure S2A.tif
- Figure S2B.tif
- Figure S2C.tif
- Figure S2D.tif
- Figure S3.tif
- Figure S4.tif
- Figure S5.tif
- Figure S7.tif
- Figure S8.tif
- FigureS6.tif
- Supplementary figure legend.pdf
- Supplementary File S1.pdf
- Supplementary tables.pdf
